# Supplementary material for: Variation in referral rates to emergency departments and inpatient services from a GP out of hours service and the potential impact of alternative staffing models
Source: HighWire-hosted journal article supplement (doi:10.1136/emermed-2020-209527), 2021-03-23
Supplement: emermed-2020-209527supp001_data_supplement.pdf [file emermed-2020-209527supp001_data_supplement.pdf]

|                                    | % referred to hospital (including ED) |            |                        | % advised to contact own GP |            |                        | % with no follow-up |            |                        |
|------------------------------------|---------------------------------------|------------|------------------------|-----------------------------|------------|------------------------|---------------------|------------|------------------------|
|                                    | OOH Base Visit                        | Home Visit | Telephone contact only | OOH Base Visit              | Home Visit | Telephone contact only | OOH Base Visit      | Home Visit | Telephone contact only |
| <b>Clinician type</b>              |                                       |            |                        |                             |            |                        |                     |            |                        |
| GP trainee                         | 8.96                                  | 12.82      | 10.99                  | 43.32                       | 50.00      | 44.32                  | 43.95               | 25.21      | 36.63                  |
| GP                                 | 7.19                                  | 10.18      | 6.70                   | 35.51                       | 37.62      | 33.45                  | 53.40               | 41.01      | 48.48                  |
| ENP                                | 5.49                                  | 8.51       | 6.26                   | 30.66                       | 28.34      | 29.99                  | 52.80               | 45.15      | 50.79                  |
| EPP                                | 8.33                                  | 10.00      | 9.14                   | 32.58                       | 38.81      | 32.78                  | 38.51               | 32.52      | 40.61                  |
| <b>Usual location of work</b>      |                                       |            |                        |                             |            |                        |                     |            |                        |
| No regular local practice          | 8.26                                  | 11.60      | 8.71                   | 38.44                       | 38.64      | 36.96                  | 48.48               | 36.60      | 41.37                  |
| Regular local practice             | 6.39                                  | 8.41       | 4.81                   | 33.62                       | 36.86      | 30.04                  | 56.67               | 45.00      | 55.28                  |
| <b>Frequency of working in OOH</b> |                                       |            |                        |                             |            |                        |                     |            |                        |
| No regular shifts                  | 8.75                                  | 14.82      | 7.08                   | 30.63                       | 33.04      | 25.96                  | 55.72               | 34.59      | 55.94                  |
| Regular shifts                     | 6.87                                  | 8.94       | 6.66                   | 36.48                       | 38.53      | 35.05                  | 52.91               | 42.09      | 46.82                  |
| <b>Clinician contract</b>          |                                       |            |                        |                             |            |                        |                     |            |                        |
| Contracted                         | 6.39                                  | 10.36      | 7.38                   | 28.31                       | 34.08      | 30.44                  | 51.88               | 35.80      | 47.16                  |
| Locum                              | 7.75                                  | 8.76       | 8.72                   | 42.54                       | 52.41      | 35.69                  | 44.02               | 29.90      | 42.96                  |
| Salaried                           | 7.16                                  | 5.48       | 8.72                   | 41.32                       | 44.60      | 34.14                  | 48.81               | 42.31      | 43.34                  |
| Sessional                          | 7.14                                  | 10.31      | 6.36                   | 35.10                       | 36.66      | 33.29                  | 53.79               | 41.05      | 49.29                  |

Supplementary Table 1. Outcomes by category of GP and type of contact

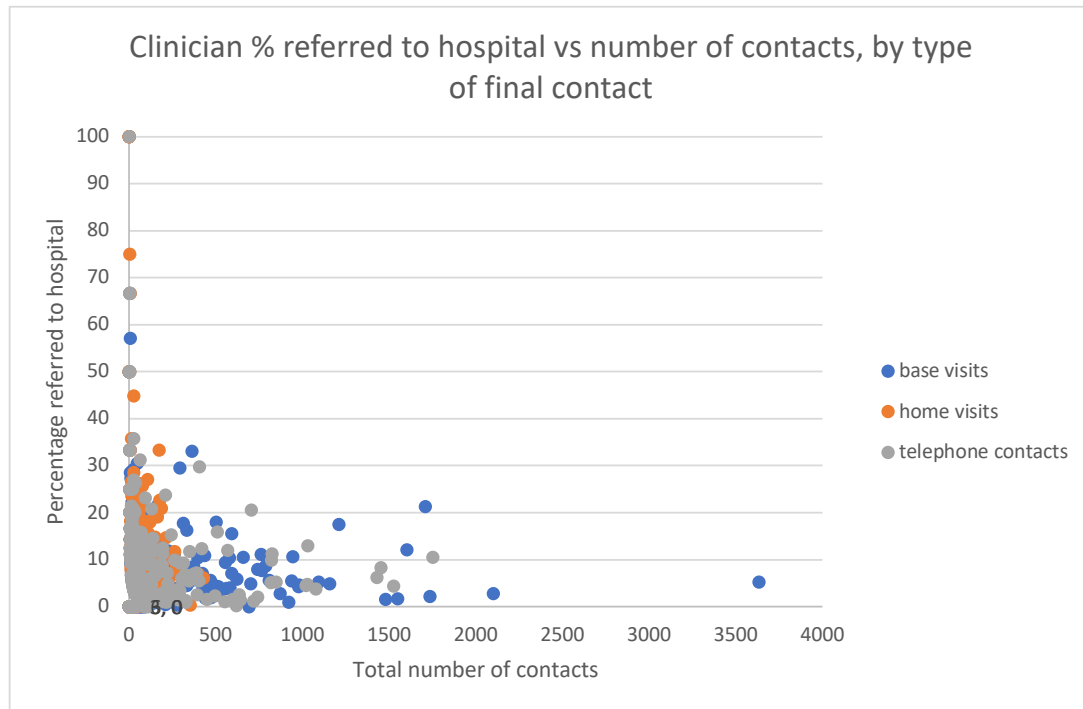

Supplementary Figure 1 Individual clinician's % referred to hospital by number of contacts and by type of final contact
